# Supplementary material for: n-3 Polyunsaturated Fatty Acids and Metabolic Syndrome Risk: A Meta-Analysis
Source: MDPI journal article supplement (doi:10.3390/nu9070703), 2017-07-06
Supplement: s1 [file s1]

Table S1 Characteristics of included studies

| Study, year      | Nation | Type of the Studies | Participants /cases | Age (years) | Gender (F/M) | Exposure assessment | Exposure categories                   | MetS Ascertainment | Adjusted variables                                                                                                                                                   |
|------------------|--------|---------------------|---------------------|-------------|--------------|---------------------|---------------------------------------|--------------------|----------------------------------------------------------------------------------------------------------------------------------------------------------------------|
| Chien, 2011      | China  | Case-control        | 1986/1000           | 54.7 ± 10.7 | 710/1276     | Plasma              | n-3 PUFA; EPA and DHA                 | NCEP ATP III       | Age, gender, BMI, smoking, drinking, exercise, LDL cholesterol, systolic, diastolic blood pressure, uric acid, fasting glucose levels and total fat amount in plasma |
| Dai, 2015        | China  | Cross-sectional     | 720/180             | 57.6±6.1    | Male         | Erythrocyte         | Total n-3 PUFA; ALA; EPA; DPA and DHA | NCEP ATP III       | Age, dietary intake of total energy, saturated fat, fiber, alcohol drinking, smoking status, education level, physical activity and BMI                              |
| Dai, 2015        | China  | Cross-sectional     | 1614/558            | 55.4 ±5.3   | Female       | Erythrocyte         | Total n-3 PUFA; ALA; EPA; DPA and DHA | NCEP ATP III       | Age, dietary intake of total energy, saturated fat, fiber, alcohol drinking, smoking status, education level, physical activity and BMI                              |
| Denisenko, 2015  | Russia | Cross-sectional     | 46/31               | 21-69       | NR           | Plasma erythrocytes | n-3 PUFA                              | AAC                |                                                                                                                                                                      |
| Gabriel, 2014    | Mexico | Case-control        | 75/44               | 13.6 ± 1.3  | 37/38        | Erythrocyte         | ALA; EPA and DHA                      | a                  |                                                                                                                                                                      |
| Gil-Campos, 2008 | Spain  | Case-control        | 37/17               | 9.4±0.5     | 11/26        | plasma              | n-3 PUFA; ALA; EPA DPA and DHA        | NCEP ATP III       |                                                                                                                                                                      |
| Huang,           | China  | Cross-              | 919/210             | 44.4 ± 8.1  | 201/717      | Plasma PL           | n-3 PUFA;                             | NCEP               | Age and sex                                                                                                                                                          |

|                         |        |                 |           |                                  |           |             |                                 |                     |                                                                                                                                                                                                                                                 |
|-------------------------|--------|-----------------|-----------|----------------------------------|-----------|-------------|---------------------------------|---------------------|-------------------------------------------------------------------------------------------------------------------------------------------------------------------------------------------------------------------------------------------------|
| 2010                    |        | sectional       |           |                                  |           |             | EPA; DPA and DHA                | ATP III             |                                                                                                                                                                                                                                                 |
| Lai, 2013               | USA    | Cross-sectional | 4941/1038 | 52.1 ± 13.9                      | 2672/2269 | FFQ         | Dietary n-3 PUFA intake         | NCEP ATP III        | Age, gender, race, alcohol intake, smoking, exercise, TV watching, energy intake, multivitamin use, and fruits and vegetables intake                                                                                                            |
| Lee, 2008               | Korea  | Case-control    | 132/44    | 54.5 ± 9.2                       | 60/68     | Erythrocyte | n-3 PUFA, ALA, EPA, DPA and DHA | NCEP ATP III        |                                                                                                                                                                                                                                                 |
| Li, 2006                | China  | Case-control    | 195/76    | 60.5 ± 10.7                      | 67/52     | Serum       | ALA; EPA and DHA                | CDS                 |                                                                                                                                                                                                                                                 |
| Mayneris-Perxachs, 2013 | Spain  | Cross-sectional | 427/315   | 67.6 ± 5.9                       | 250/177   | Plasma      | ALA; EPA and DHA                | AHA; WHF, IAS; IASO | Gender, age, energy intake, BMI, smoking status (current; past, 0-1 year; past, 1-5 year; past, >5 years; never), occupation (worker, unemployed or unfit, retired), and educational level (none, primary school, secondary school, university) |
| Mennen, 2000            | France | Cross-sectional | 2439/600  | 46.8 ± 74.0                      | Male      | FFQ         | Fish intake                     | Arbitrary criteria  | Age, waist-hip ratio and energy intake                                                                                                                                                                                                          |
| Mennen, 2000            | France | Cross-sectional | 2537/941  | 47.5 ± 6.1                       | Female    | FFQ         | Fish intake                     | Arbitrary criteria  | Age, waist-hip ratio and energy intake                                                                                                                                                                                                          |
| Mirmiran, 2012          | Iran   | Cross-sectional | 2457/NR   | F: 38.0 ± 12.8<br>M: 40.7 ± 14.4 | 1130/1327 | FFQ         | Dietary n-3 PUFA intake         | NCEP ATP III        | Age, gender, smoking status, physical activity, total energy intake, percentage of energy from carbohydrate, protein, saturated fatty acid, monounsaturated fatty acid, oleic acid, and total fiber                                             |
| Noel,                   | USA    | Cross-          | 1207/NR   | 45-75                            | NR        | FFQ         | Dietary n-3                     | AHA                 | Age, gender, smoking and alcohol use, physical                                                                                                                                                                                                  |

|                        |         |                     |            |             |                 |                        |                                                |                 |                                                                                                                                            |
|------------------------|---------|---------------------|------------|-------------|-----------------|------------------------|------------------------------------------------|-----------------|--------------------------------------------------------------------------------------------------------------------------------------------|
| 2010                   |         | sectional           |            |             |                 |                        | PUFA intake                                    |                 | activity, education, fish oil supplement use, acculturation, total energy, total fat, dietary fiber, lipid-lowering medication use and BMI |
| Novgorodts<br>eva,2011 | Russia  | Case-<br>control    | 46/31      | 21-69       | NR              | Plasma                 | Total n-3<br>PUFA;<br>ALA; EPA<br>and DHA      | AHA             |                                                                                                                                            |
| Kouki,<br>2011         | Finland | Cross-<br>sectional | 663/182    | 66.3 ± 5.4  | Male            | 4-day<br>food record   | Fish intake                                    | NCEP<br>ATP III | Age, smoking, alcohol consumption, education and maximal oxygen uptake                                                                     |
| Kouki,<br>2011         | Finland | Cross-<br>sectional | 671/169    | 66.4 ± 5.3  | Female          | 4-day food<br>record   | Fish intake                                    | NCEP<br>ATP III | Age, smoking, alcohol consumption, education and maximal oxygen uptake                                                                     |
| Kabagambe,<br>2008     | USA     | Cross-<br>sectional | 630/396    | 48.7 ± 16.2 | 539/491         | Erythrocyte            | Total n-3<br>PUFA; ALA;<br>EPA; DPA<br>and DHA | NCEP<br>ATP III |                                                                                                                                            |
| Kawashima,<br>2009     | Japan   | Case-<br>control    | 51/24      | 49.8 ± 6.3  | Male            | Plasma                 | ALA; EPA<br>and DHA                            | JCDCMS          |                                                                                                                                            |
| Klein-Platat,<br>2005  | France  | Cross-<br>sectional | 75/15      | NR          | NR              | Plasma PL<br>and CE    | n-3 PUFA;<br>ALA; EPA<br>and DHA               | NCEP<br>ATP III |                                                                                                                                            |
| Park,<br>2016          | Korea   | Cross-<br>sectional | 38766/8536 | NR          | 23059/<br>15707 | 24 h<br>dietary recall | Dietary n-3<br>PUFA intake                     | NCEP<br>ATP III | Sex, age, BMI, residence area, education level, smoking status, alcohol consumption, physical activities and obesity                       |
| Ruidavets,<br>2007     | France  | Cross-<br>sectional | 912/214    | 55.1 ± 6.1  | Male            | 3-day food<br>record   | Fish intake                                    | NCEP<br>ATP III | Age, center, physical activity, level of education, smoking habits, alcohol intake, drugs for                                              |

|                |         |                 |            |            |             |             |                  |                         |                                                                                                                                                                                                                                             |
|----------------|---------|-----------------|------------|------------|-------------|-------------|------------------|-------------------------|---------------------------------------------------------------------------------------------------------------------------------------------------------------------------------------------------------------------------------------------|
| Tørris, 2016   | Norway  | Cross-sectional | 12981/2934 | 30-87      | 6880/6101   | FFQ         | Fish intake      | JIS                     | hypertension and dyslipidaemia, energy intake (without alcohol), dieting and diet quality index                                                                                                                                             |
| Tørris, 2016   | Norway  | Cross-sectional | 23907      | 44 ± 11.69 | 12432/11475 | FFQ         | Fish intake      | JIS                     | Age, physical activity, cod liver oil, parity and lactation                                                                                                                                                                                 |
| Vanhala, 2012  | Finland | Cross-sectional | 274/92     | 46.1 ± 6.0 | Male        | Serum       | n-3 PUFA         | AHA; WHF; IAS; and IASO | Gender, education, physical activity, living with a spouse, parity and lactation                                                                                                                                                            |
| Vanhala, 2012  | Finland | Cross-sectional | 391/111    | 45.8±6.2   | Female      | Serum       | n-3 PUFA         | AHA; WHF; IAS; and IASO |                                                                                                                                                                                                                                             |
| Warensjö, 2006 | Sweden  | Cross-sectional | 2009/281   | 50         | Male        | Serum CE    | ALA; EPA and DHA | NCEP ATP III            | BMI, smoking habits, and physical activity                                                                                                                                                                                                  |
| Warensjö, 2006 | Sweden  | Cross-sectional | 576/147    | 70         | Male        | Serum CE    | ALA; EPA and DHA | NCEP ATP III            | BMI, smoking habits, physical activity, smoking habits and physical activity                                                                                                                                                                |
| Warensjö, 2005 | Sweden  | Cross-sectional | 706/119    | 70         | Male        | Serum CE    | ALA; EPA and DHA | NCEP ATP III            |                                                                                                                                                                                                                                             |
| Zaribaf, 2014  | Iran    | Cross-sectional | 420/105    | 35.2 ± 7.2 | Female      | FFQ         | Fish intake      | NCEP ATP III            | Age, energy intake, physical activity, socioeconomic status, medication use, marital and menopausal status, dietary intakes of red meat, whole and refined grains, fruits, vegetables, legume and nuts, dairy products, fiber, oils and BMI |
| Zhang, 2012    | China   | Cross-sectional | 2754/1123  | 50-70      | NR          | Erythrocyte | ALA and DHA      | NCEP ATP III            | Age, sex, region, residence, smoking, alcohol drinking, physical activity, educational attainment,                                                                                                                                          |

family history of diabetes and CVD, total energy intake, red meat intake, fiber intake, BMI and CRP

---

Abbreviations: a, waist circumference (WC) > 90th percentile and at least three of the following, HDL-C < 50 mg/dL, TG > 110 mg/dL, diastolic and/or systolic blood pressure (BP) > 90th percentile adjusted by age, gender and height, and/or fasting glucose (FG) > 100 mg/dL; AAC, American Association of Cardiology; AHA, American Heart Association; BMI, body mass index; CE, Cholesteryl esters; CDS, Chinese Diabetes Society; FFQ, Food-frequency questionnaire; IAS, International Atherosclerosis Society; IASO, International Association for the Study of Obesity; JCDCMS, Japanese Committee for the Diagnostic Criteria of Metabolic Syndrome; MetS, Metabolic syndrome; NCEP-ATP III, National Cholesterol Education Program Adult Treatment Panel III criteria; NHLBI, National Heart, Lung, and Blood Institute; PL, Phospholipid; JIS, Joint Interim Societies; WHF, World Heart Federation; WHO, World Health Organization.

# Circulating ALA

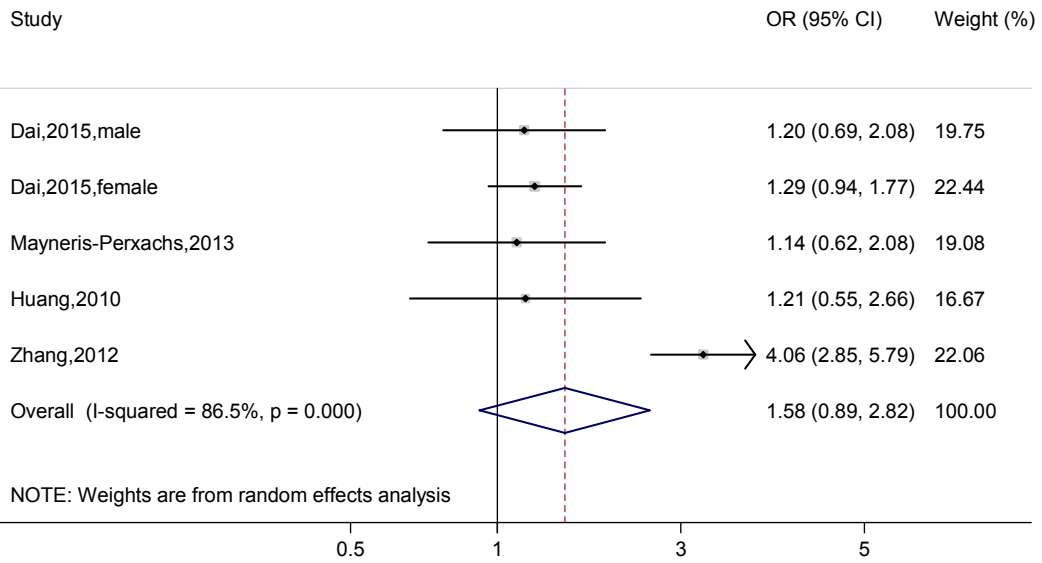

Figure S1 Forest plot to quantify the association of circulating ALA composition with metabolic syndrome risk

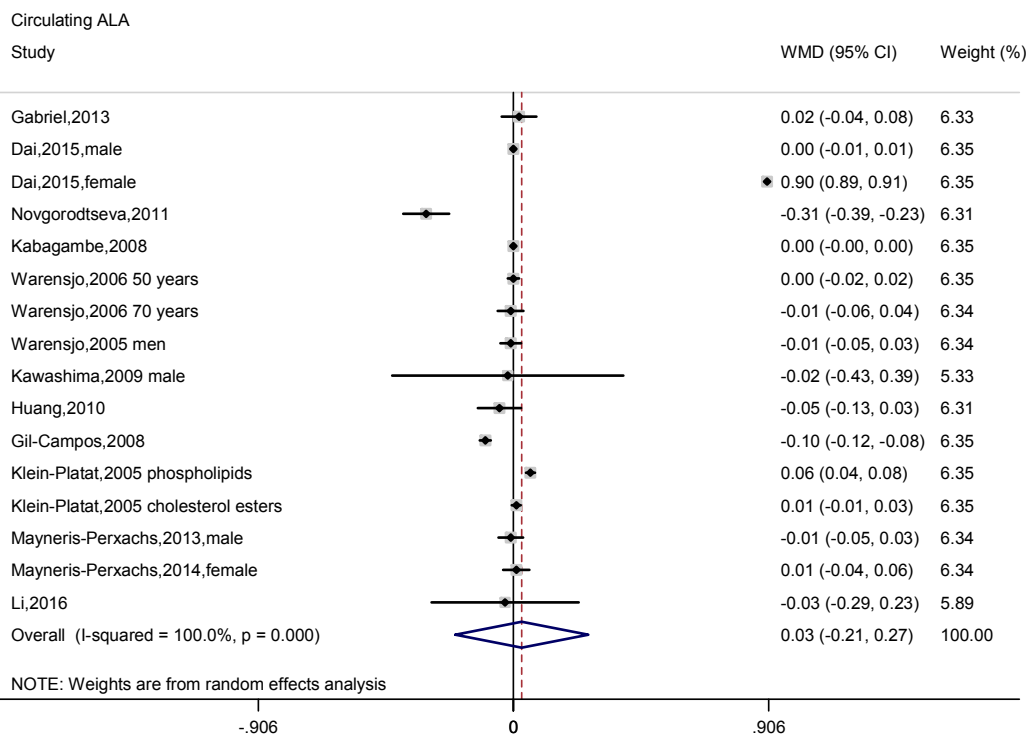

Figure S2 Differences of circulating ALA composition between cases and controls

#### Dietary n-3 PUFA intake

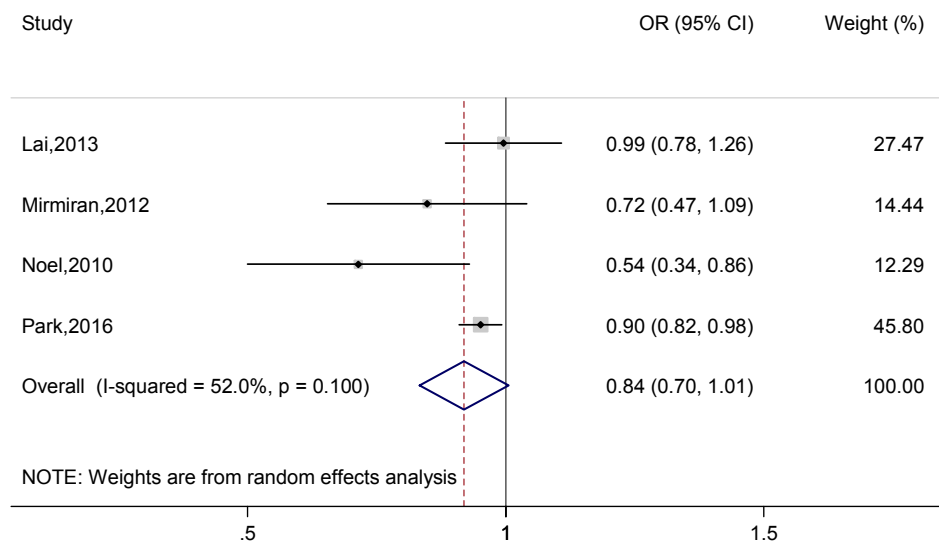

Figure S3 Forest plot to quantify the association of circulating dietary n-3 PUFA intake with metabolic syndrome risk

#### Dietary fish intake

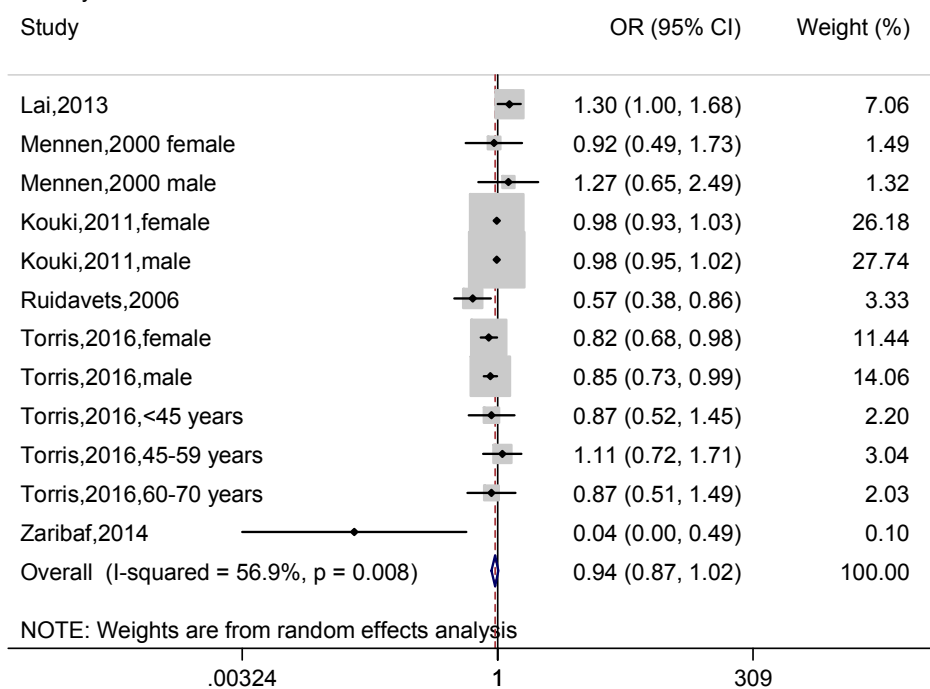

Figure S4 Forest plot to quantify the association of circulating dietary fish intake with metabolic syndrome risk

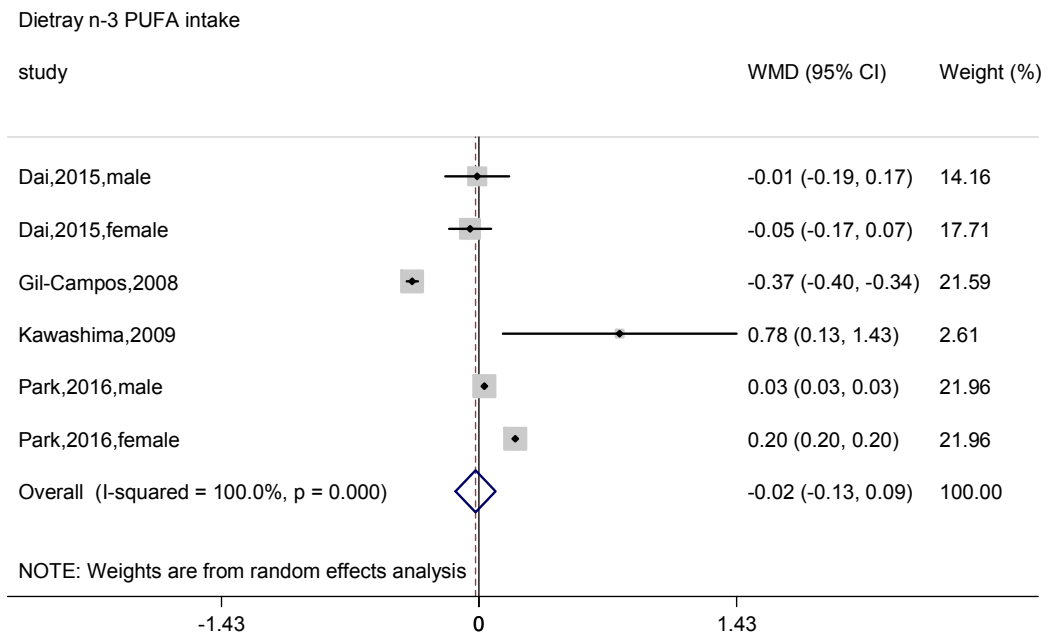

Figure S5 Differences of dietary n-3 PUFA intake between cases and controls

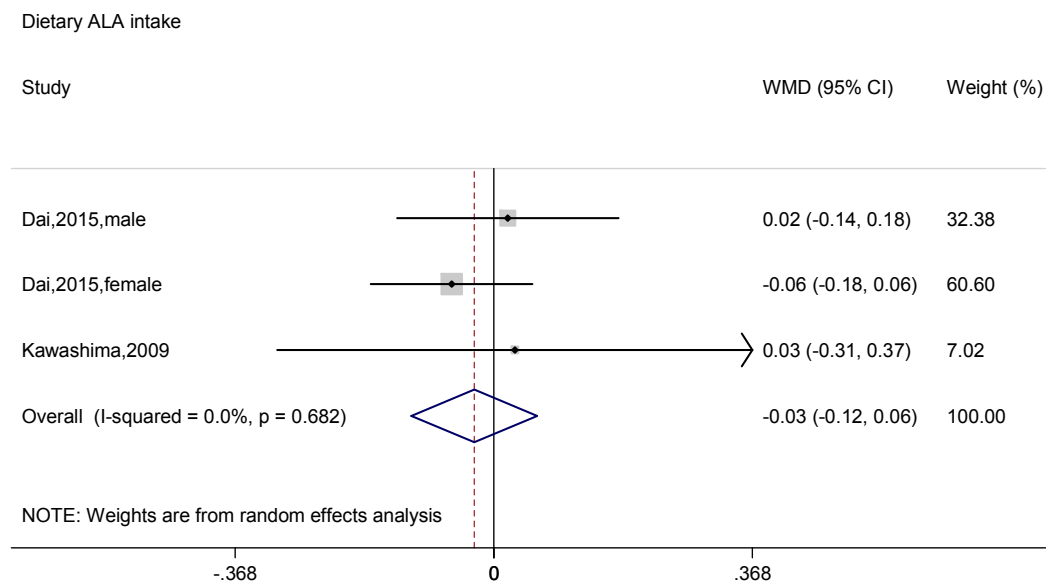

Figure S6 Differences of dietary ALA intake between cases and controls



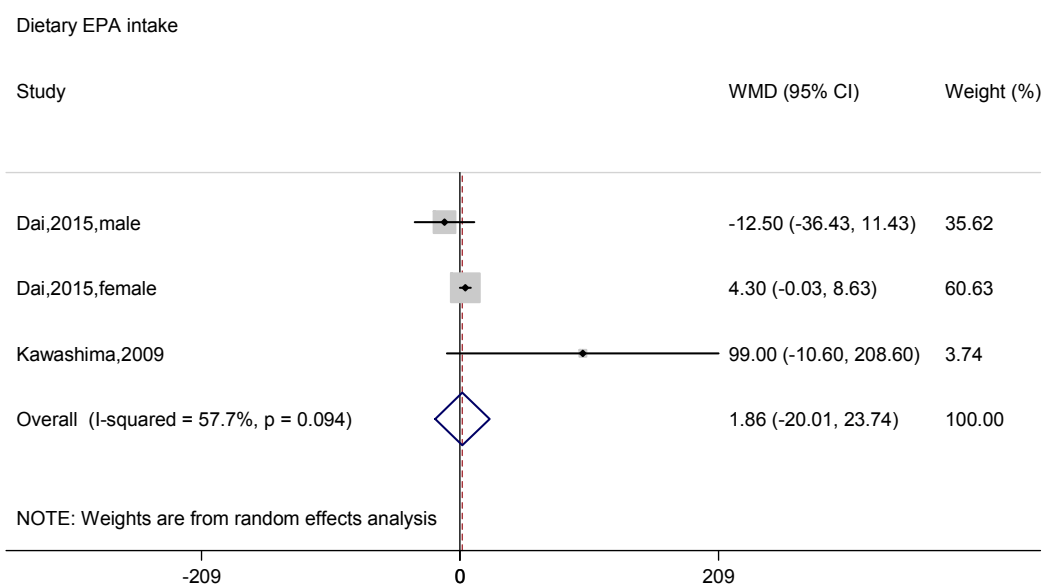

Figure S7 Differences of dietary EPA intake between cases and controls

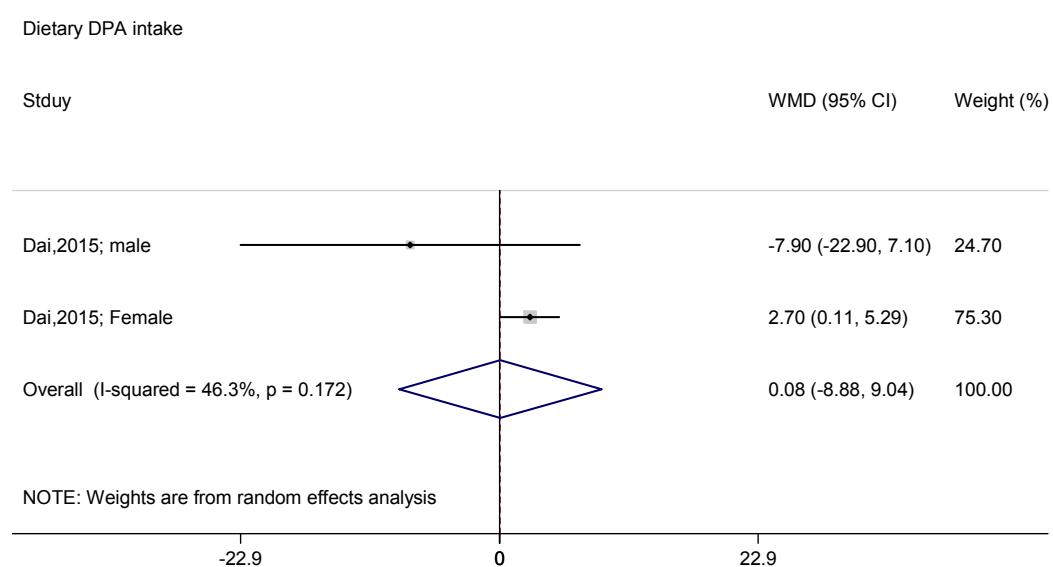

Figure S8 Differences of dietary DPA intake between cases and controls

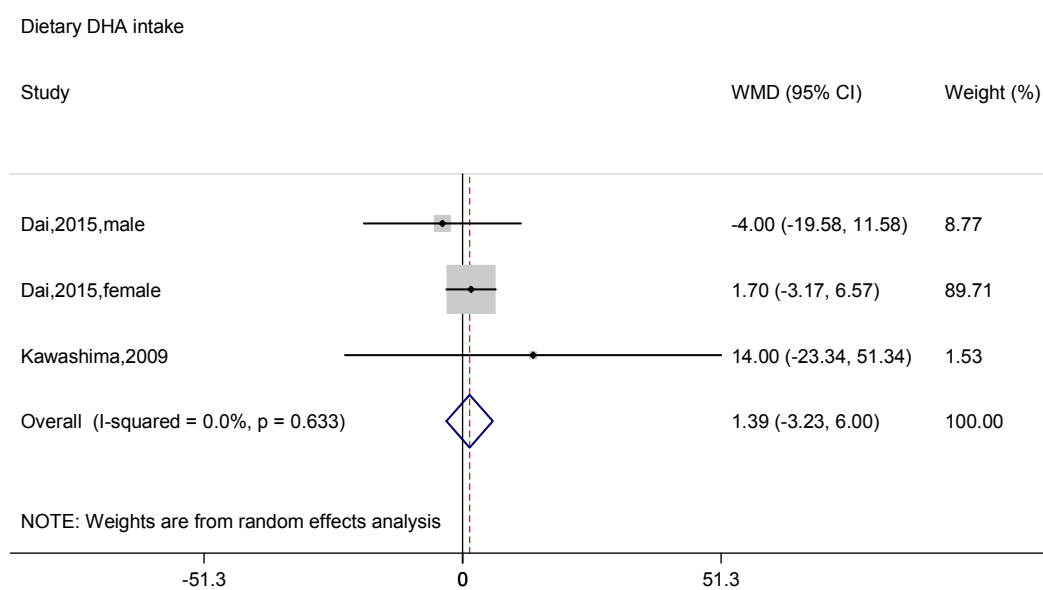

Figure S9 Differences of dietary DHA intake between cases and controls

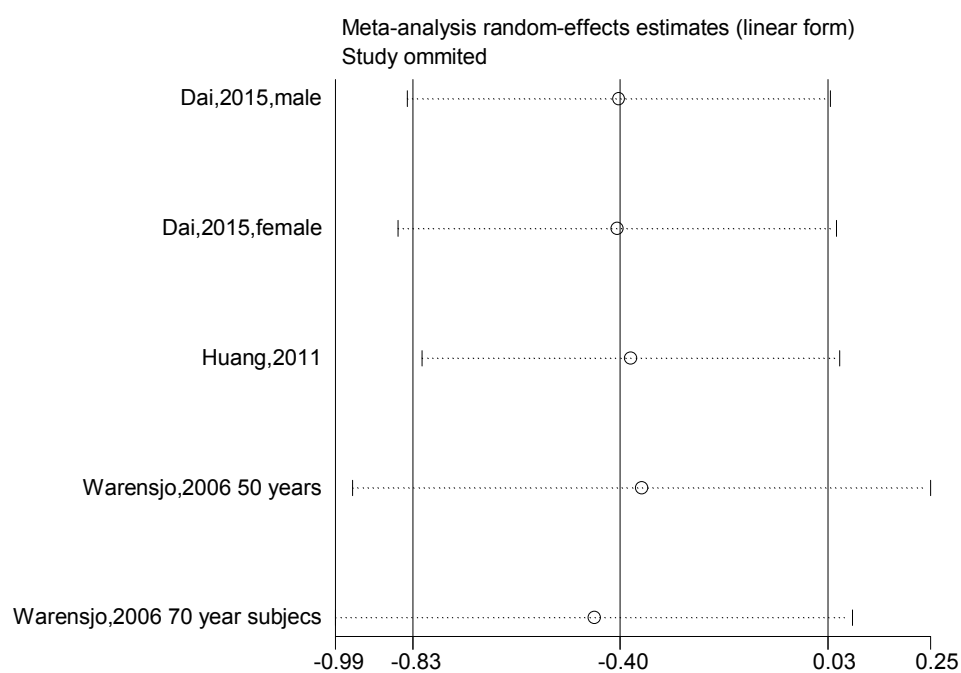

Figure S10 Sensitivity analysis for n-3 PUFAs associated with MetS risk

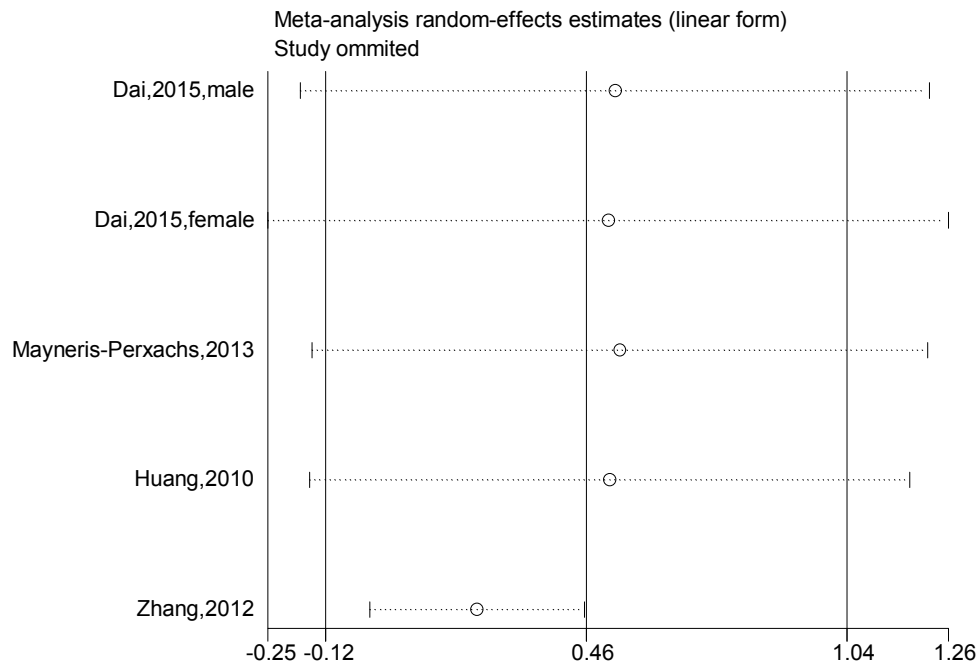

Figure S11 Sensitivity analysis for ALA associated with MetS risk

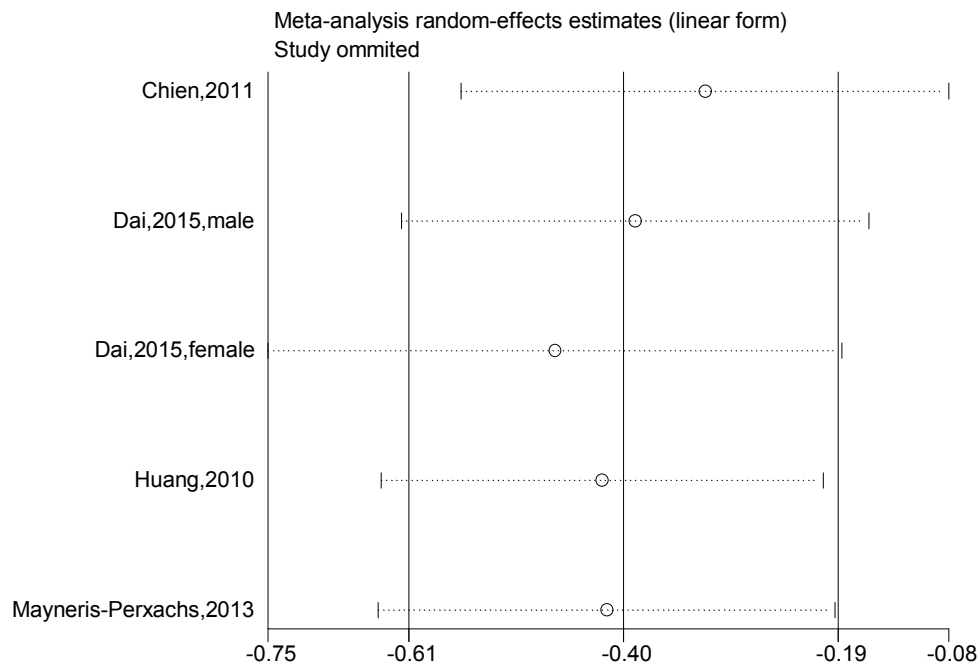

Figure S12 Sensitivity analysis for EPA associated with MetS risk

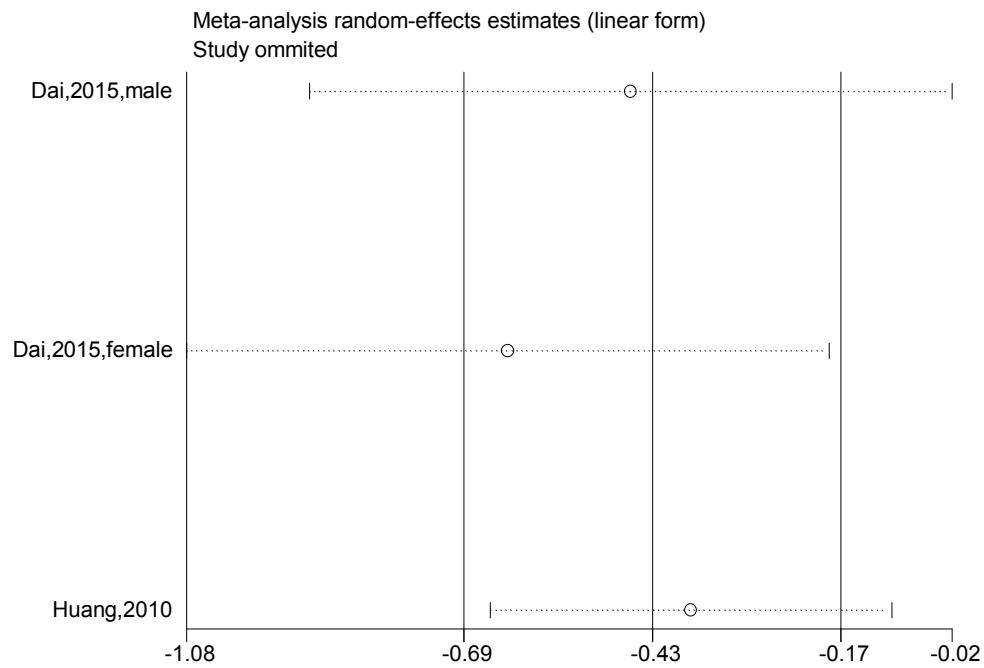

Figure S13 Sensitivity analysis for DPA associated with MetS risk

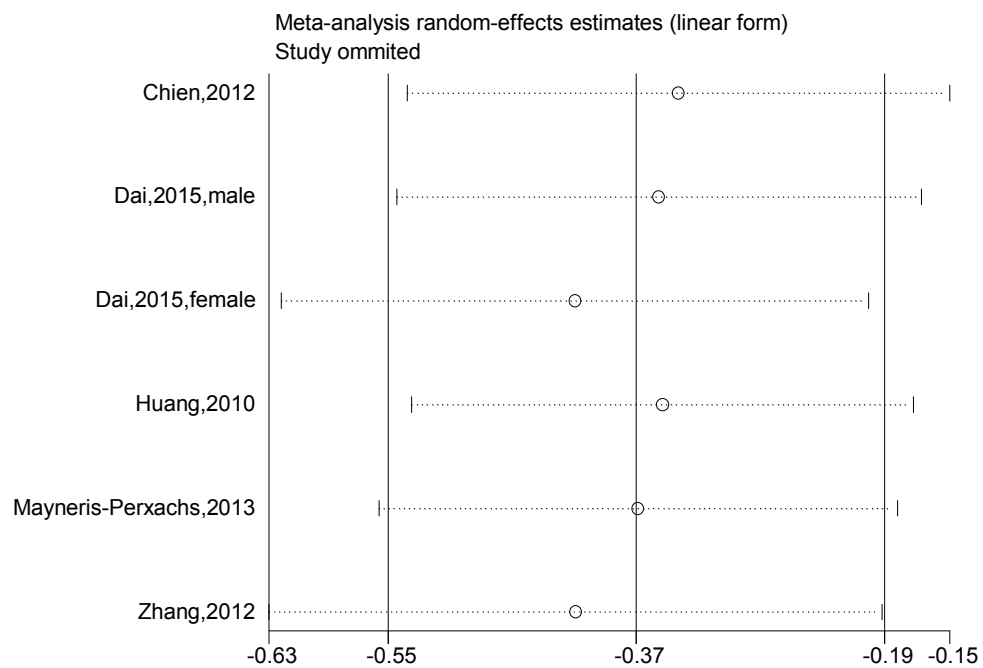

Figure S14 Sensitivity analysis for DHA associated with MetS risk

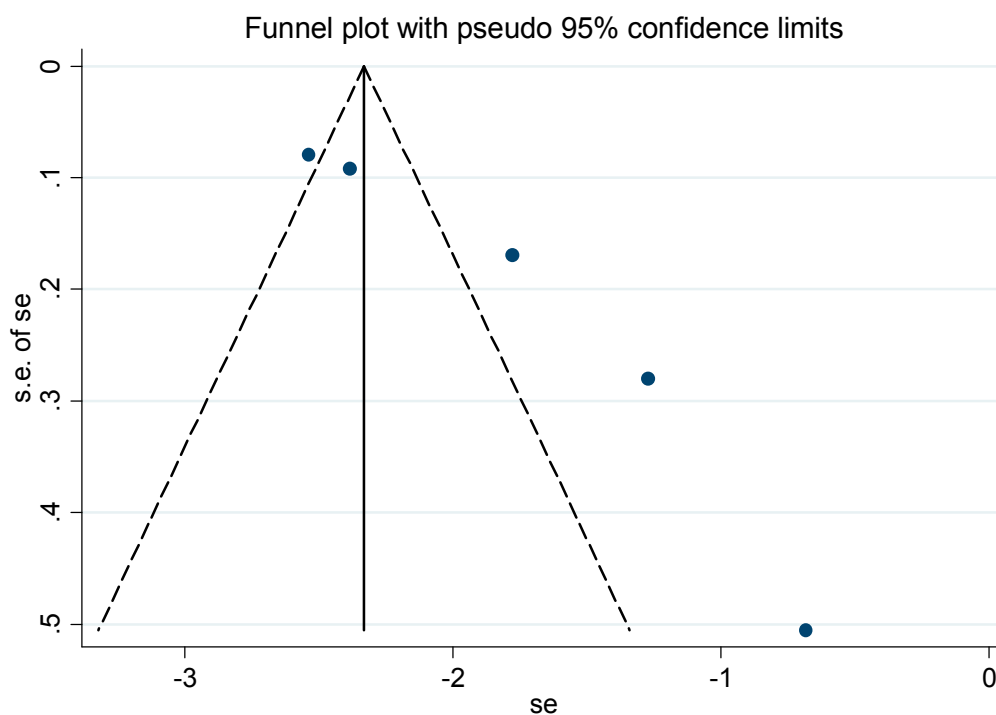

Figure S15 Funnel plot for circulating n-3 PUFAs associated with MetS risk

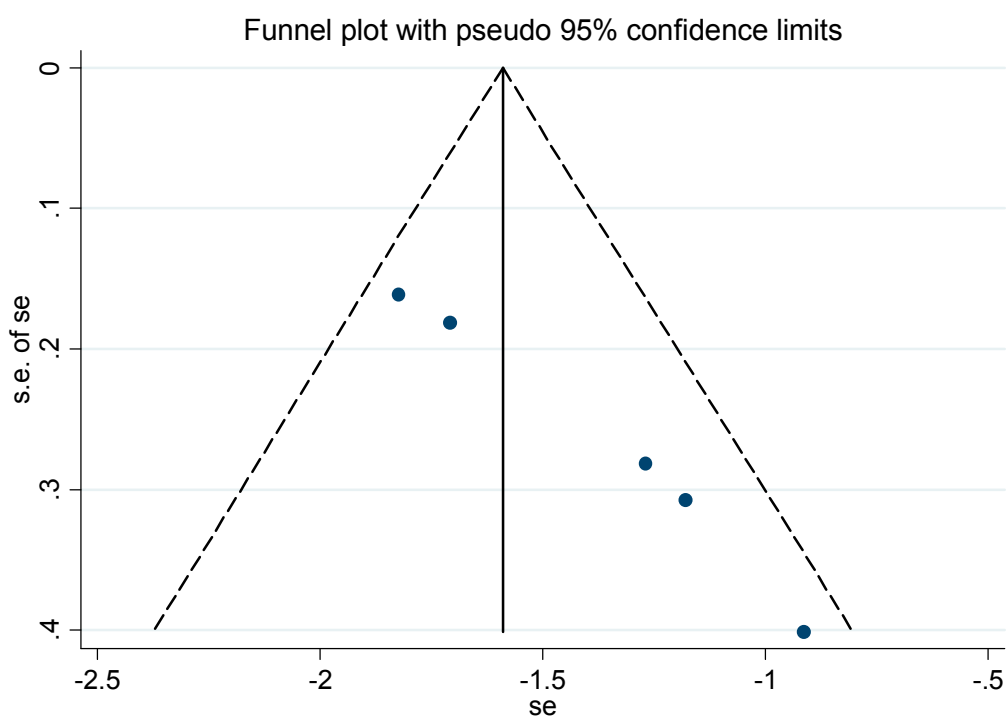

Figure S16 Funnel plot for circulating ALA associated with MetS risk

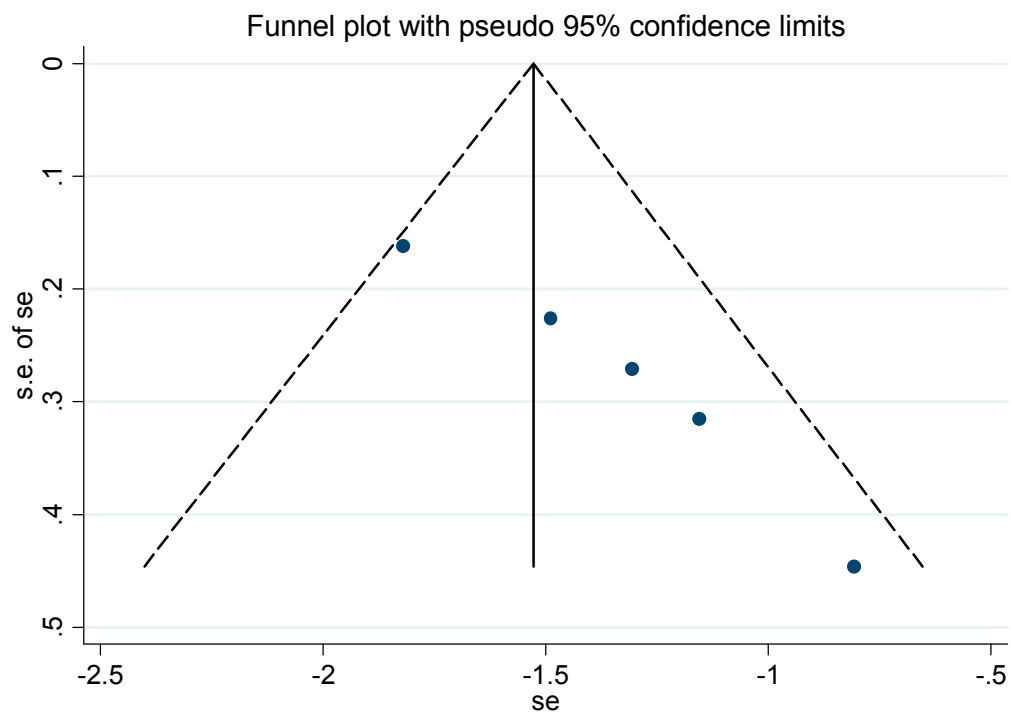

Figure S17 Funnel plot for circulating EPA associated with MetS risk

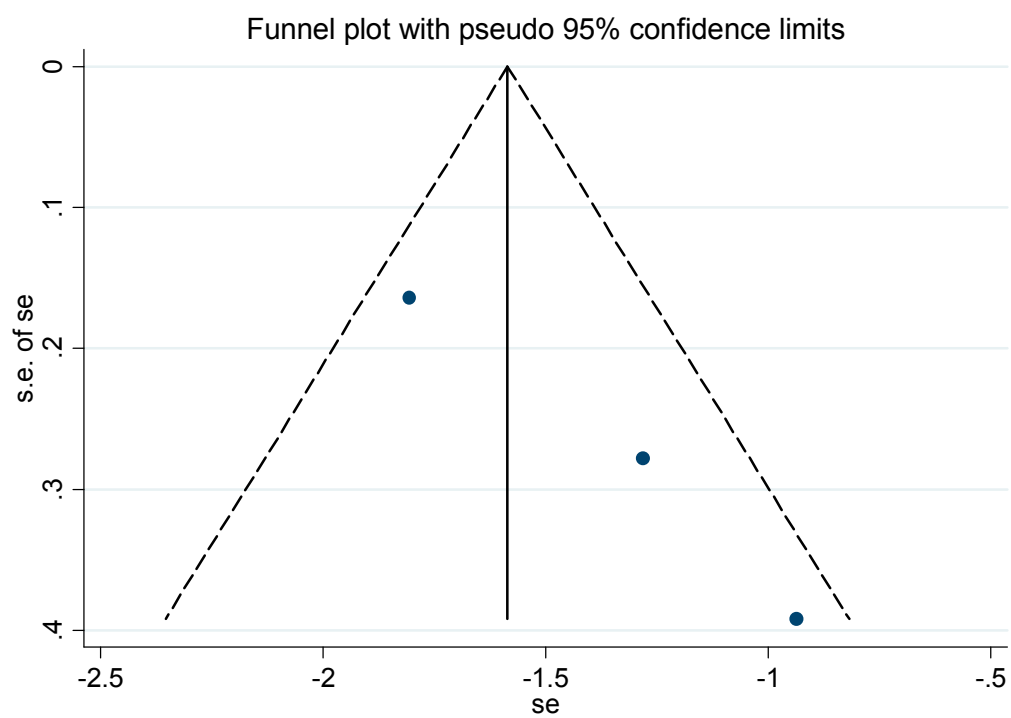

Figure S18 Funnel plot for circulating DPA associated with MetS risk

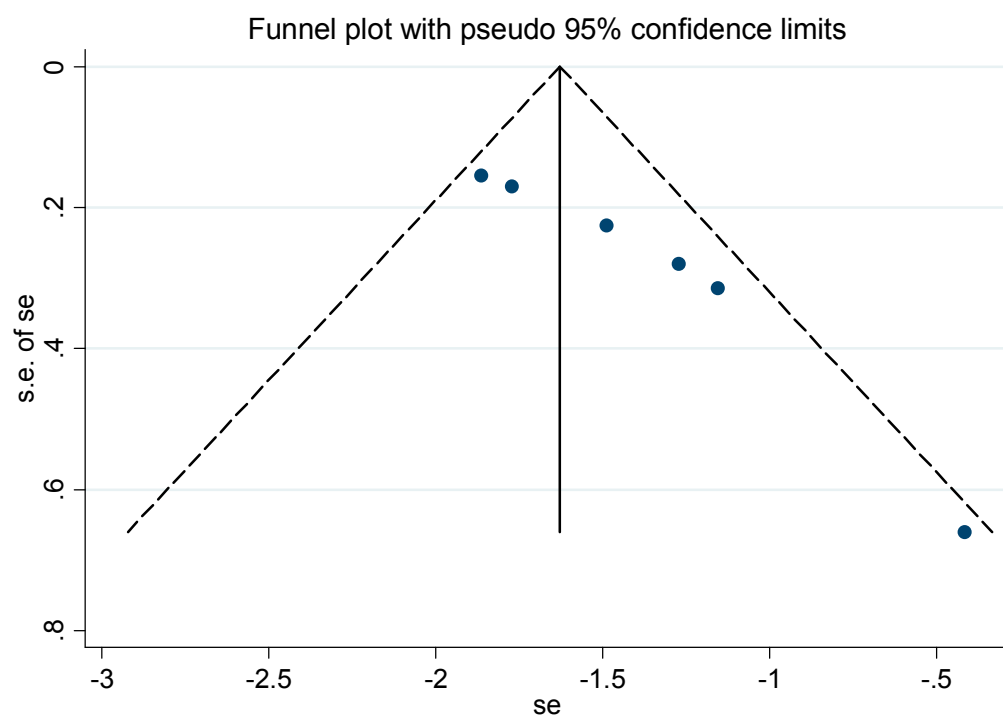

Figure S19 Funnel plot for circulating DHA associated with MetS risk
